# Supplementary material
Source: PubMed Central journal article supplement (PMC7001495)
Supplement: EMBR-21-e48466-s001.pdf [file EMBR-21-e48466-s001.pdf]

1 **Appendix for CrRLK1L receptor-like kinases HERCULES RECEPTOR**  
2 **KINASE 1 and ANJEA are female determinants of pollen tube reception**

3

4 Sergio Galindo-Trigo<sup>1,2</sup>, Noel Blanco-Touriñán<sup>3</sup>, Thomas A. DeFalco<sup>4,5</sup>, Eloise S. Wells<sup>1</sup>,  
5 Julie E Gray<sup>6</sup>, Cyril Zipfel<sup>4,5</sup>, Lisa M Smith<sup>1\*</sup>

6

7 **Table of contents**

8

9

**Page no.**

10 Appendix Figure S1

3

11 Appendix Figure S2

4

12 Appendix Figure S3

5

13 Appendix Figure S4

6

14 Appendix Figure S5

7

15 Appendix Figure S6

8

16 Appendix Figure S7

9

17 Appendix Figure S8

10

18 Appendix Figure S9

11

19 Appendix Table S1

12

20 Appendix Table S2

14

21 Appendix Table S3

18

22 References

19

23

24

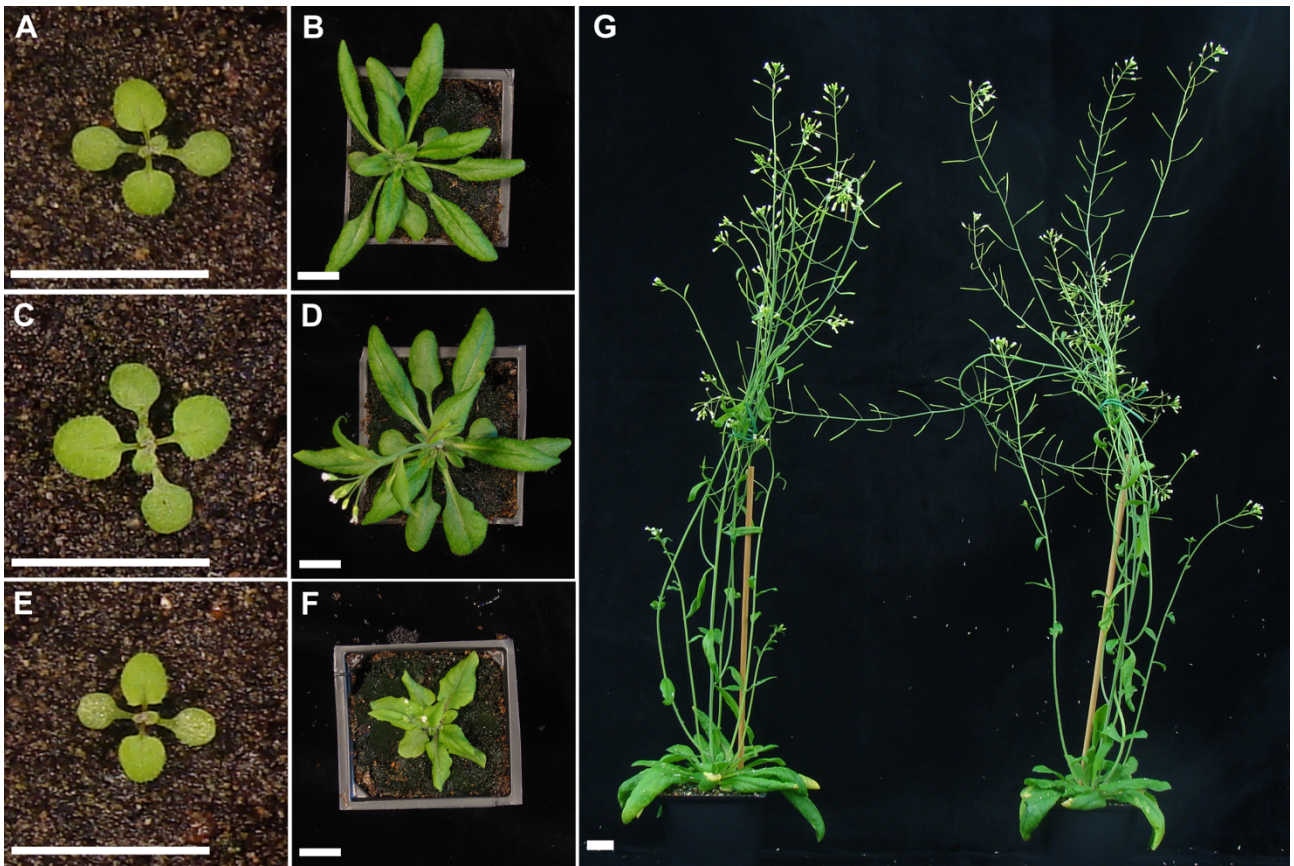

25  
26  
27

28 **Appendix Figure S1. Growth comparison of WT and *herk1 anj* plants.** All scale bars = 1.5 cm.

29 A,B Representative wild-type plants at 10 and 21 days old.

30 C,D Representative *herk1 anj* plants at 10 and 21 days old.

31 E,F Representative *fer-4* plants at 10 and 21 days old.

32 G Representative wild-type and *herk1 anj* plants (left and right, respectively) at 5 weeks old.

33

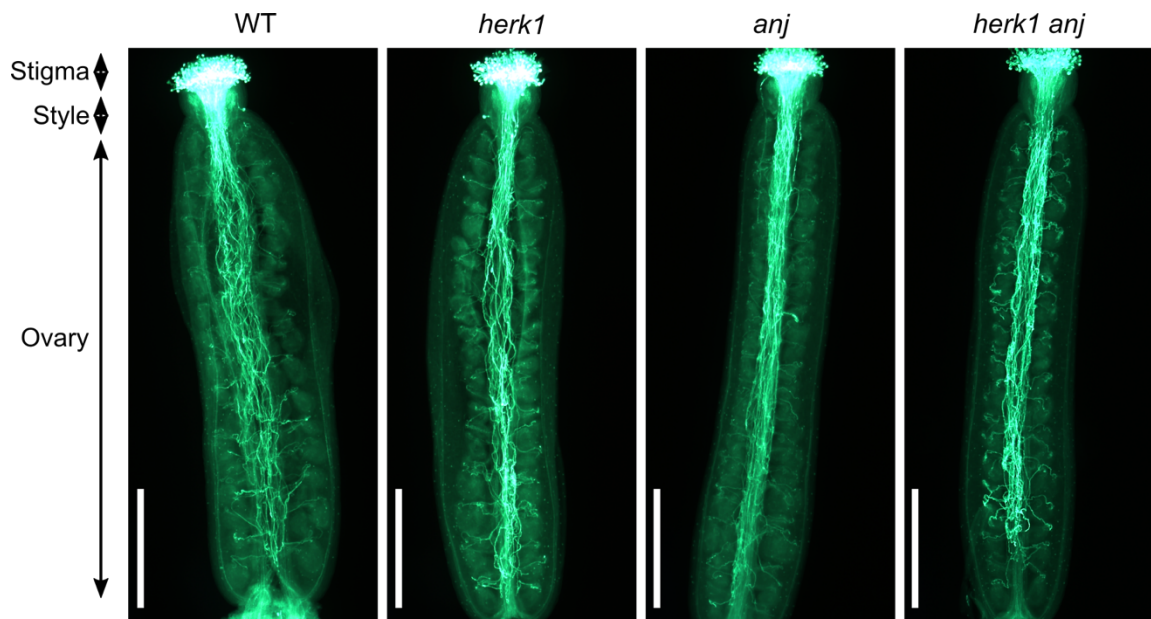

34

35 **Appendix Figure S2. Pollen tube growth and targeting of ovules is not altered in *herk1 anj***  
36 **plants.** Aniline blue staining of pollen tubes in self-pollinated stage 16 flowers in wild-type, *herk1*,  
37 *anj* and *herk1 anj* plants. Scale bars = 500  $\mu$ m.

38

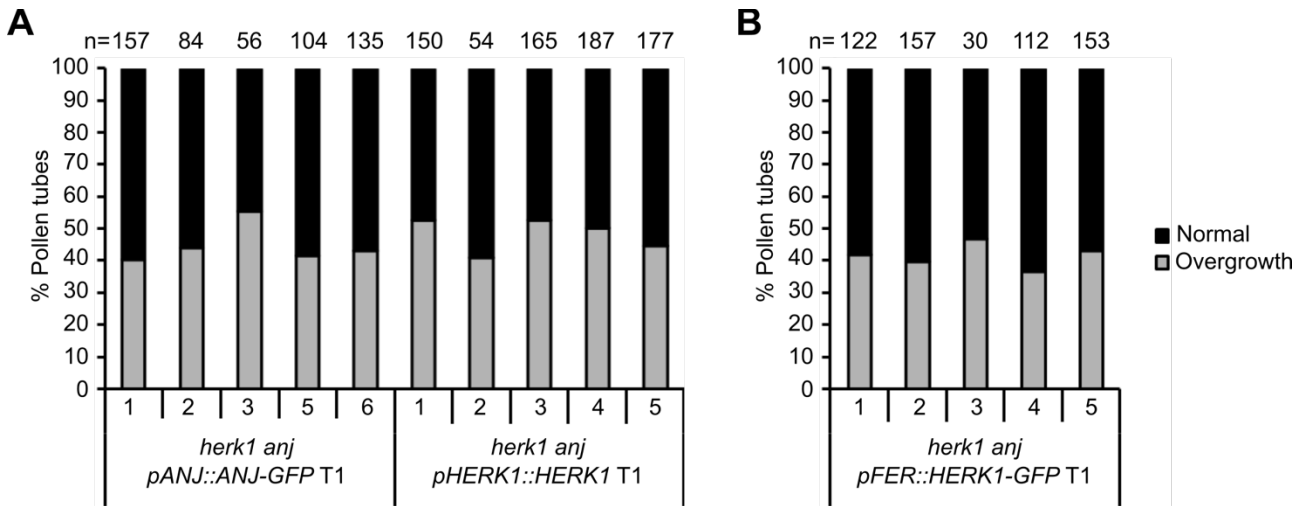

39  
40  
41

42 **Appendix Figure S3. The *herk1 anj* defect in pollen tube reception can be complemented**  
43 **by expression of *HERK1* and *ANJ* constructs.**

44 A Percentage of pollen tubes with normal reception at the female gametophyte (black bars) and  
45 displaying overgrowth (grey bars) in siliques of five independent T1 *herk1 anj* plants transformed  
46 with *pANJ::ANJ-GFP*, and *pHERK1::HERK1*. Pollen tube reception was scored for ovules in at least  
47 three siliques per line. *pANJ::ANJ-GFP* T1 line 4 was excluded from the figure due to non-  
48 complementation of the seed phenotype.

49 B Percentage of pollen tubes with normal reception at the female gametophyte (black bars) and  
50 displaying overgrowth (grey bars) in siliques of five independent T1 *herk1 anj* plants transformed  
51 with *pFER::HERK1-GFP*.

52

53

54

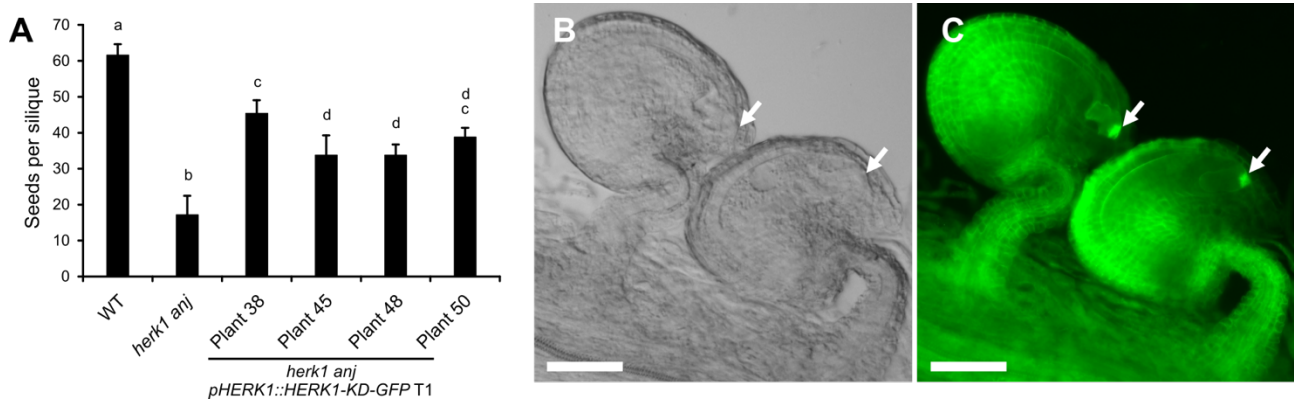

55

56

57 **Appendix Figure S4. Kinase dead HERK1 expressed under its own promoter can**  
58 **complement the seed phenotype.**

59 A Developing seeds per silique in wild-type, *herk1 anj*, and *pHERK1::HERK1-KD-GFP* T1 plants.  
60 Fully expanded siliques were cleared and photographed under a stereomicroscope. Four  
61 independent T1 lines were examined and seeds in five siliques per plant counted. Data presented  
62 are means per silique  $\pm$  SD (n = 5). Letters (a-d) mark statistically significant differences between  
63 samples in one-way ANOVA analysis followed by Bonferroni's post-hoc comparison of means  
64 ( $p < 0.05$ ). *pHERK1::HERK1-KD-GFP* T1 line 49 was excluded from the figure due to non-  
65 complementation of the seed phenotype.

66 B,C Corresponding DIC image (B) and localisation of HERK1-KD-GFP (C) in the synergid cell from  
67 the *pHERK1::HERK1-KD-GFP* construct. Scale bars = 50  $\mu$ m. White arrows, filiform apparatus.

68

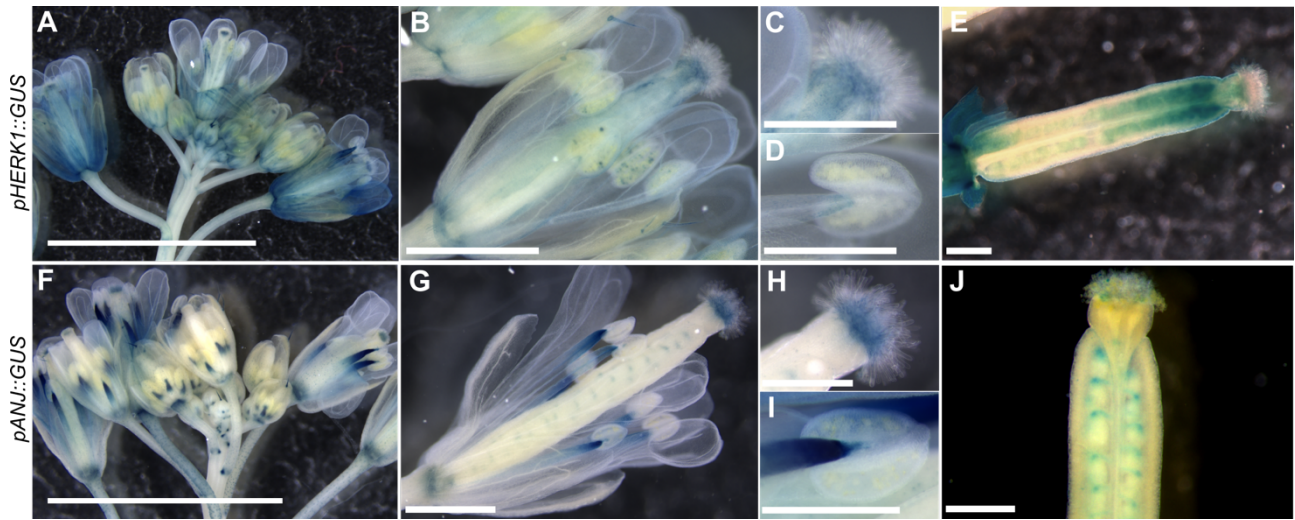

69

70 **Appendix Figure S5. Expression pattern of *HERK1* and *ANJ* in flowers.**

71 A,B Representative image of the expression pattern in inflorescences and flowers of *HERK1* as  
 72 shown by *pHERK1::GUS*. Details of a mature stigma, an anther, and a silique are shown in (C), (D),  
 73 and (E) respectively.

74 F,G Representative image of the expression pattern in inflorescences and flowers of *ANJ* as shown  
 75 by *pANJ::GUS*. Details of a mature stigma, an anther, and a silique are shown (H), (I), and (J),  
 76 respectively.

77 GUS activity in at least four T1 lines was examined. Scale bars = 5 mm in (A,F) 1 mm in (B,G); 0.5  
 78 mm in (C,D,E,H,I,J).

79

80

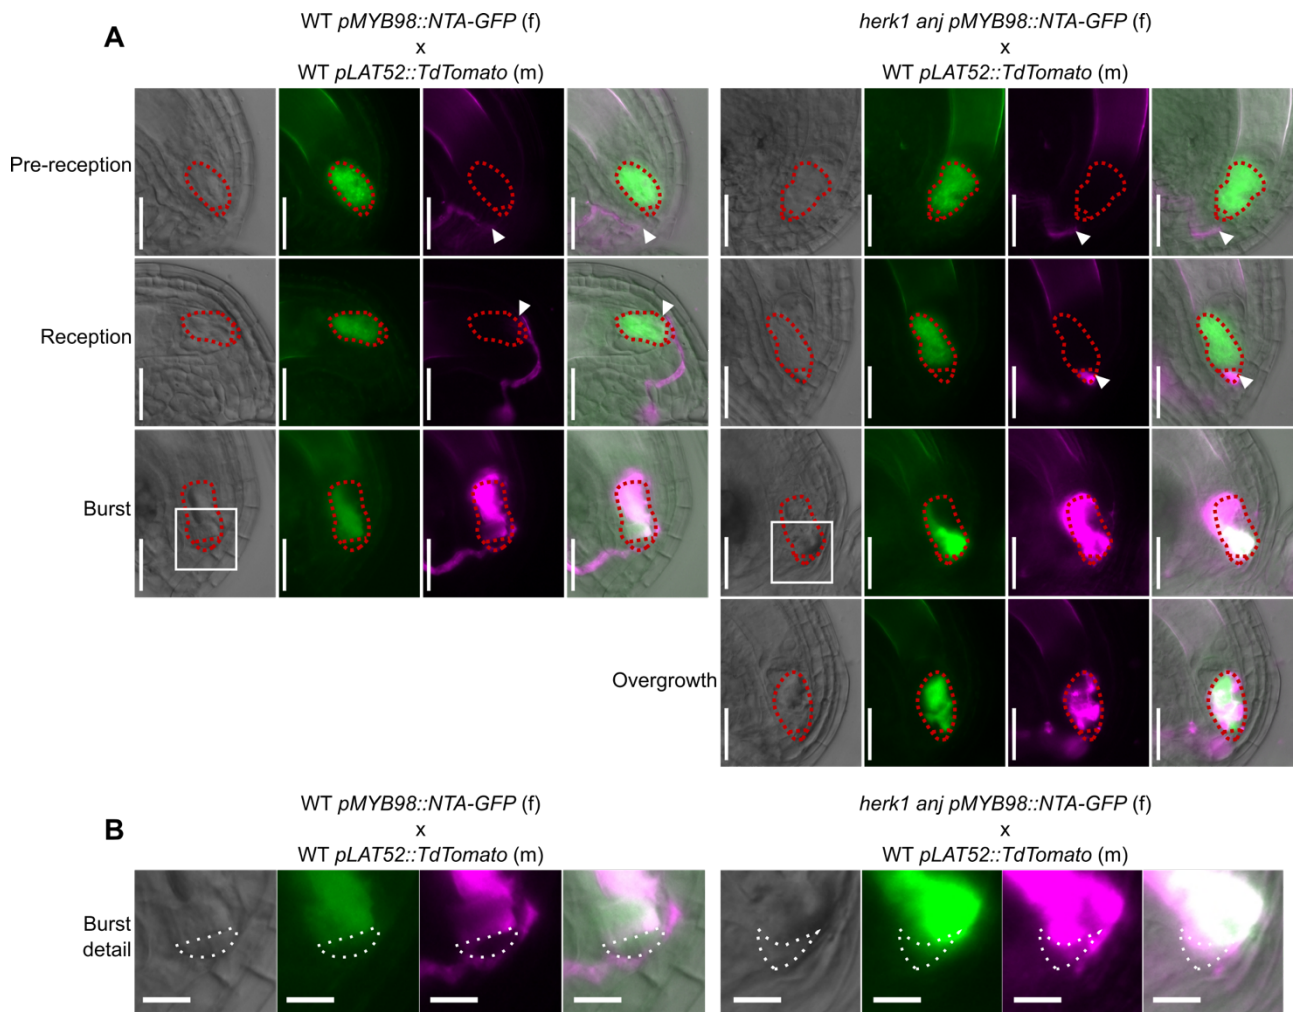

81

82 **Appendix Figure S6. NTA localisation in the synergid cells of WT and *herk1 anj* at different**  
 83 **stages of pollen tube reception.**

84 A DIC images are shown in grey. In green is NTA-GFP fluorescence in ovules expressing  
 85 *pMYB98::NTA-GFP*. In magenta, TdTomato fluorescence from pollen tubes expressing  
 86 *pLAT52::TdTomato*. On the right are merged DIC and fluorescence images. Red dotted lines  
 87 delineate the synergid cells. White arrowheads indicate the pollen tube tip. Scale bars = 25  $\mu$ m.

88 B Detailed images of the filiform apparatus corresponding to the areas highlighted with white squares  
 89 in (A). White dotted lines delineate the filiform apparatus. Scale bars = 10  $\mu$ m.



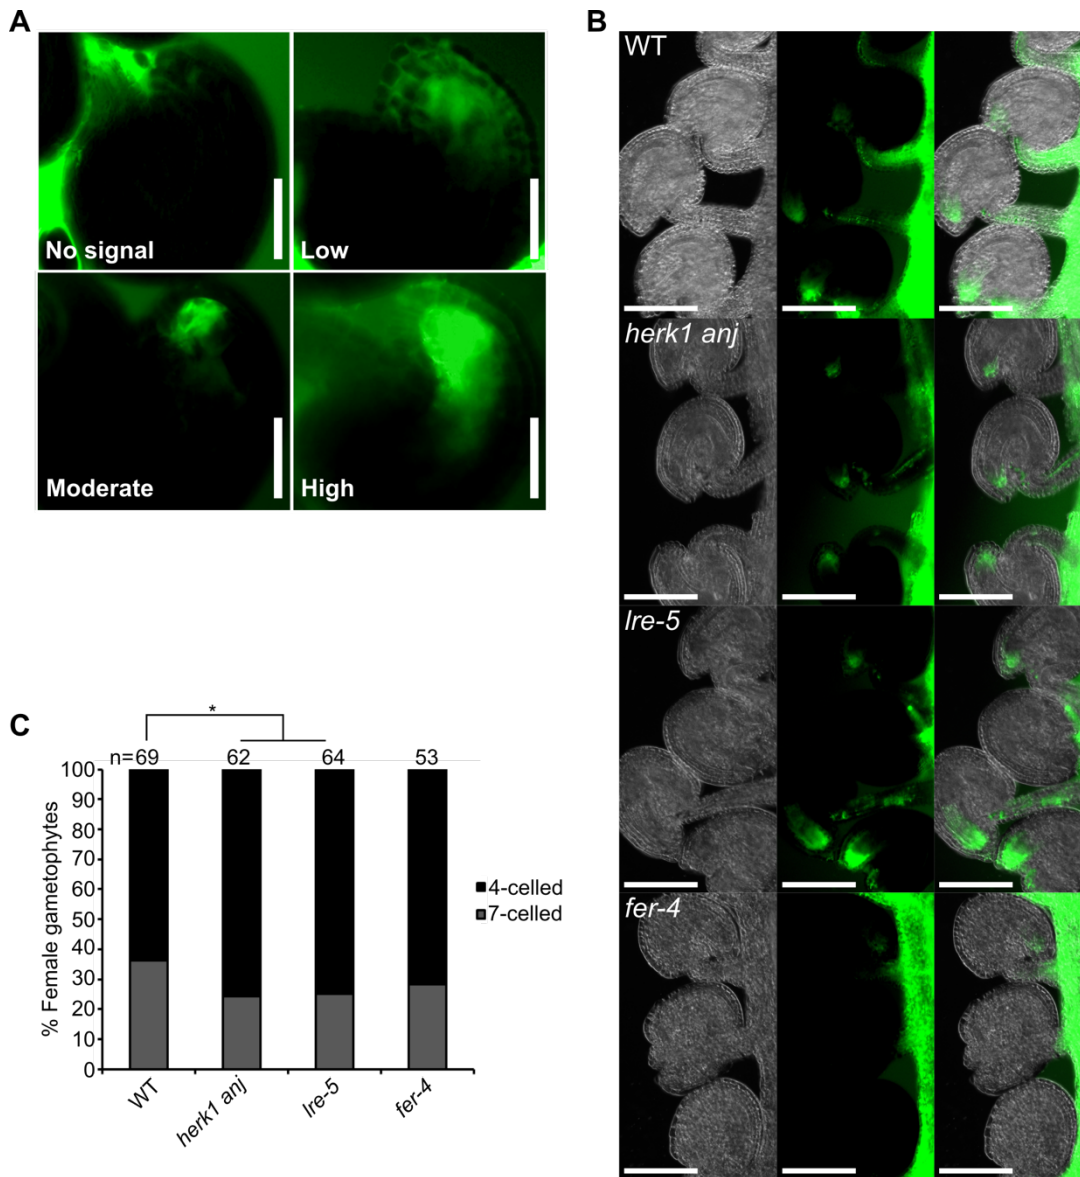

90

91 **Appendix Figure S7. H<sub>2</sub>DCF-DA measurements of ROS production in *herk1 anj* ovules.**

92 A Images of H<sub>2</sub>DCF-DA fluorescence in representative ovules corresponding to each category used  
93 in the ROS assays presented in this study. Scale bars = 25 μm.

94 B Representative images of H<sub>2</sub>DCF-DA staining of ROS in three ovules from wild-type, *herk1 anj*,  
95 *Ire-5* and *fer-4* plants at 20 hours after emasculaton (HAE). Scale bars = 100 μm.

96 C Female gametophyte development stage in ovules from stage 14 flowers at 20 hours after  
97 emasculaton (HAE) in wild-type, *herk1 anj*, *Ire-5* and *fer-4* as assessed by confocal microscopy as  
98 per [1]. Ovules analysed from five siliques per line. \* p<0.05 (χ-square tests).

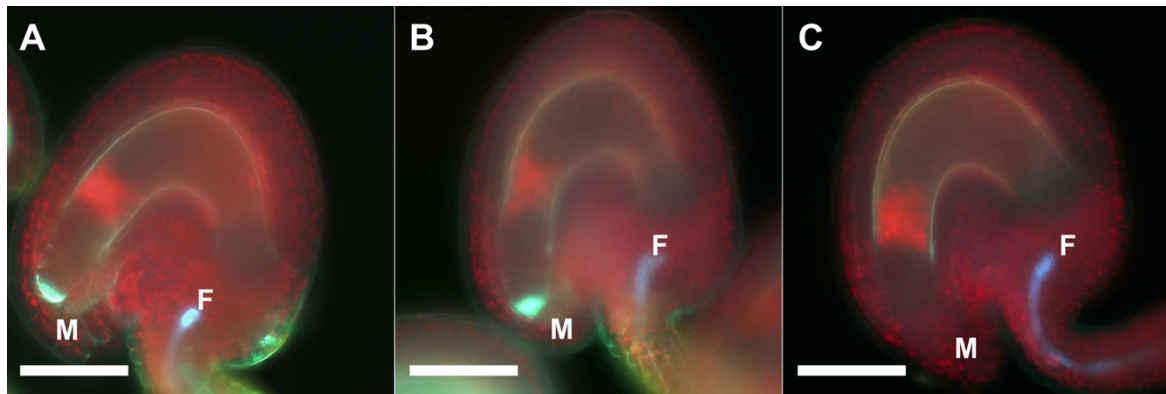

99  
100  
101

102 **Appendix Figure S8. Callose accumulation at the filiform apparatus in *herk1 anj* mutants.**

103

104 A Representative image of a mature ovule from a wild-type plant. SR2200 white fluorescence at the  
105 filiform apparatus indicates accumulation of callose.

106

107 B Representative image of a mature ovule from a *herk1 anj* plant. SR2200 white fluorescence at the  
108 filiform apparatus indicates accumulation of callose.

109

110 C Representative image of the background autofluorescence present in mature ovules.

111

112 Chlorophyll red autofluorescence can be seen in all cell layers in the ovule. Blue autofluorescence  
113 from the xylem lignin within the funiculus can also be observed. Scale bars = 25  $\mu$ m. M, micropyle.

114 F, funiculus.

115

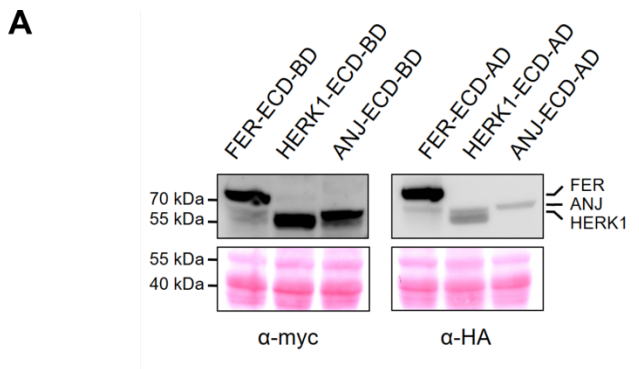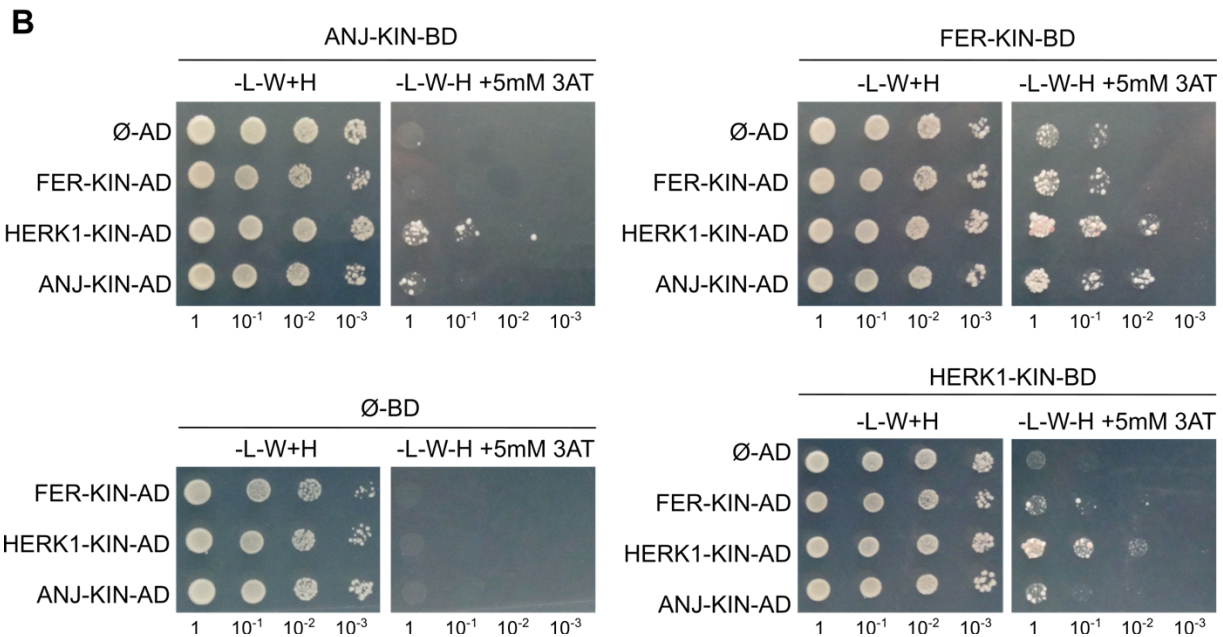

116  
117  
118  
119  
120

**Appendix Figure S9. Yeast two hybrid assays between HERK1, ANJ and FER domains.**

121 A Western blots showing expression of the FER, HERK1 and ANJ ECD domains in yeast as detected  
122 by anti-Myc and anti-HA antibodies. Ponceau red staining of the membrane is included below as a  
123 loading control.

124

125 B Yeast two hybrid assays with the intracellular kinase domains of HERK1, ANJ and FER (HERK1-  
126 KIN, ANJ-KIN and FER-KIN, respectively). Ø represents negative controls where no sequence was  
127 cloned into the activating domain (AD) or DNA-binding domain (BD) constructs. -L-W-H, growth  
128 medium depleted of leucine (-L), tryptophan (-W) and histidine (-H). Plates were supplemented  
129 with 5 mM 3-Amino-1,2,4-triazole (3 AT) due to yeast growth autoactivation in several of these  
130 constructs.

131 **Appendix Table S1. List of Arabidopsis lines use in this study.** Sources and NASC stock  
 132 identifiers are listed where relevant.

| <b>Experimental Models: Organisms/Strains</b>                                |                       |                 |
|------------------------------------------------------------------------------|-----------------------|-----------------|
| <i>Arabidopsis thaliana</i> : Col-0                                          | NASC                  | N1092           |
| <i>Arabidopsis thaliana</i> : <i>herk1-1</i>                                 | NASC                  | N657488         |
| <i>Arabidopsis thaliana</i> : <i>anj-1</i>                                   | NASC                  | N654842         |
| <i>Arabidopsis thaliana</i> : <i>fer-4</i>                                   | Prof. A. Cheung [2]   | NASC ID: N69044 |
| <i>Arabidopsis thaliana</i> : <i>lre-5</i>                                   | Dr. R. Palanivelu [3] | NASC ID: N66102 |
| <i>Arabidopsis thaliana</i> : <i>herk1-1 anj-1</i>                           | This study            | N/A             |
| <i>Arabidopsis thaliana</i> : <i>herk1-1 anj-1 lre-5</i>                     | This study            | N/A             |
| <i>Arabidopsis thaliana</i> : Col-0 CRISPR <i>fer</i>                        | This study            | N/A             |
| <i>Arabidopsis thaliana</i> : <i>herk1-1 anj</i> CRISPR <i>fer</i>           | This study            | N/A             |
| <i>Arabidopsis thaliana</i> : Col-0 <i>herk1 anj lre-5</i> CRISPR <i>fer</i> | This study            | N/A             |
| <i>Arabidopsis thaliana</i> : Col-0 <i>pHERK1::GUS</i>                       | This study            | N/A             |
| <i>Arabidopsis thaliana</i> : Col-0 <i>pANJ::GUS</i>                         | This study            | N/A             |
| <i>Arabidopsis thaliana</i> : Col-0 <i>pHERK1::H2B-tdTomato</i>              | This study            | N/A             |
| <i>Arabidopsis thaliana</i> : Col-0 <i>pANJ::H2B-tdTomato</i>                | This study            | N/A             |
| <i>Arabidopsis thaliana</i> : Col-0 <i>pHERK1::HERK1</i>                     | This study            | N/A             |
| <i>Arabidopsis thaliana</i> : Col-0 <i>pANJ::ANJ-GFP</i>                     | This study            | N/A             |
| <i>Arabidopsis thaliana</i> : Col-0 <i>pFER::HERK1-GFP</i>                   | This study            | N/A             |
| <i>Arabidopsis thaliana</i> : Col-0 <i>pHERK1::HERK1-KD-GFP</i>              | This study            | N/A             |

|                                                                      |                               |     |
|----------------------------------------------------------------------|-------------------------------|-----|
| <i>Arabidopsis thaliana</i> : Col-0 pLRE::LRE-Citrine                | This study                    | N/A |
| <i>Arabidopsis thaliana</i> : Col-0 pMYB98::NTA-GFP                  | This study                    | N/A |
| <i>Arabidopsis thaliana</i> : Col-0 pFER::FER-GFP                    | This study                    | N/A |
| <i>Arabidopsis thaliana</i> : <i>herk1-1 anj-1</i><br>pHERK1::HERK1  | This study                    | N/A |
| <i>Arabidopsis thaliana</i> : <i>herk1-1 anj-1</i> pANJ::ANJ-GFP     | This study                    | N/A |
| <i>Arabidopsis thaliana</i> : <i>herk1-1 anj-1</i> pFER::HERK1-GFP   | This study                    | N/A |
| <i>Arabidopsis thaliana</i> : <i>herk1-1 anj-1</i> pLRE::LRE-Citrine | This study                    | N/A |
| <i>Arabidopsis thaliana</i> : <i>herk1-1 anj-1</i> pMYB98::NTA-GFP   | This study                    | N/A |
| <i>Arabidopsis thaliana</i> : <i>herk1-1 anj-1</i> pFER::FER-GFP     | This study                    | N/A |
| <i>Arabidopsis thaliana</i> : <i>lre-5</i> pHERK1::HERK1             | This study                    | N/A |
| <i>Arabidopsis thaliana</i> : <i>lre-5</i> pANJ::ANJ-GFP             | This study                    | N/A |
| <i>Arabidopsis thaliana</i> : <i>lre-5</i> pLRE::LRE-Citrine         | This study                    | N/A |
| <i>Arabidopsis thaliana</i> : <i>lre-5</i> pMYB98::NTA-GFP           | This study                    | N/A |
| <i>Arabidopsis thaliana</i> : <i>lre-5</i> pFER::FER-GFP             | This study                    | N/A |
| <i>Arabidopsis thaliana</i> : Col-0 pLAT52::TdTomato                 | Dr. M. Bayer<br>(unpublished) | N/A |

133

134

| Primer name                                                         | Oligonucleotides (5' - 3')        |
|---------------------------------------------------------------------|-----------------------------------|
| HERK1 genotyping fw                                                 | GTTGCTCGCGGTAGTCTTCT              |
| HERK1 genotyping rv                                                 | CTGTCCTGAATTCCGCAAGC              |
| ANJEA genotyping fw                                                 | CTCCTCTGTAGCAAAACCAGGA            |
| ANJEA genotyping rv                                                 | CTCACGTTTACTCCCTCGGG              |
| LRE genotyping fw                                                   | AAGCCAGTTTTAGAGTACGAAGA           |
| LRE genotyping rv                                                   | TCAAGTCAACACTAACAAAGCAAAAACAGCGG  |
| FER genotyping fw                                                   | CGGATCCATGAAGATCACAGAGGGACGATTC   |
| FER genotyping rv                                                   | CGCAGATCTAGCACCAAACACACAAAACCC    |
| SALK LB genotyping primer                                           | ATTTTGCCGATTCGGAAC                |
| GABI LB genotyping primer                                           | GTGGATTGATGTGATATCTCC             |
| HERK1 qPCR fw (5' of T-DNA)                                         | GTAGGCGGTA ACTCTGGCTC             |
| HERK1 qPCR rv (5' of T-DNA)                                         | AGACGAACCCAATGACGACC              |
| HERK1 qPCR fw (3' of T-DNA)                                         | CGTCACCGCCATTTGGTTTC              |
| HERK1 qPCR rv (3' of T-DNA)                                         | CAAGCCGTTGTTTCCAAGTCA             |
| ANJ qPCR fw (5' of T-DNA)                                           | TAATGAAATCCTCGCCGCCA              |
| ANJ qPCR rv (5' of T-DNA)                                           | GGCCTCTAGCAACGGAGAAT              |
| ANJ qPCR fw (3' of T-DNA)                                           | CTGTCTATGGTACTTGCACC              |
| ANJ qPCR rv (3' of T-DNA)<br>(underlined bases do not match genome) | <u>CC</u> ACCAACATTCTTCTTAGTGGTTG |
| <i>ACTIN2</i> qPCR fw                                               | CCAGAAGGATGCATATGTTGGTG           |

|                            |                                     |
|----------------------------|-------------------------------------|
| ACTIN2 qPCR rv             | GAGGAGCCTCGGTAAGAAGA                |
| pHERK1 fw                  | TAGGTACCTAGAATGTTTTCTCAAGTTTTCTTCC  |
| HERK1 rv                   | TAAGGATCCTCTTCCTTCAGATTTACCAGTTGTG  |
| pANJ fw                    | TTAGGTACCTTGTGGAATCATGAAATCGTAGTGT  |
| ANJ rv                     | TAGGATCCACGTCCCTCAGATTTGATCAGCTGCG  |
| pFER fw                    | TAGGTACCCGAGTTGTAAAAGGCCTGGC        |
| FER rv                     | TAAGGATCCACGTCCCTTTGGATTCATGA       |
| HERK1-KD fw                | AGAAACGTGAGATCTGCAAACATATTGCTTGACGA |
| HERK1-KD rv                | AGATCTCACGTTTCTGTGAATGACCGGTTTCGAGT |
| ANJ-KD fw                  | AGAAACGTCAGATCCGCCAACATATTGCTTGA    |
| ANJ-KD rv                  | GGATCTGACGTTTCTGTGAATCACGGGTTTCG    |
| pHERK1 pentrdtopo fw       | CACCTAGAATGTTTTCTCAAGTTTTCTTCC      |
| pHERK1 pentrdtopo rv       | AACCTGGAAATGGAACAGATC               |
| pANJ pentrdtopo fw         | CACCTTGTGGAATCATGAAATCGTAGT         |
| pANJ pentrdtopo rv         | TTCACAAAACCTGGAAATTTTAAATAATT       |
| HERK1exJM Y2H (324-406) fw | GGATATTGATCTTAGCACTCTTGTGG          |
| HERK1exJM Y2H (324-406) rv | AACCCGAGATTACTCTTACTGCT             |
| ANJexJM Y2H (324-406) fw   | GCTTGATCTGAGCTCTTATTTATCCA          |
| ANJexJM Y2H (324-406) rv   | CCACCAACATTCTTCTTAGTGGTTG           |
| LRE Y2H (23-138) fw        | GATATCGGATGGTGTGTTTGAATCA           |
| LRE Y2H (23-138) rv        | CCGGCGTTTAGGTTATGTGAATAGAG          |
| HERK1 ECD Y2H (24-405) fw  | GGATTCACACCTGTGGATAATTAC            |
| HERK1 ECD Y2H (24-405) rv  | TTACCCGAGATTACTCTTACTGCT            |

|                                                                              |                                                             |
|------------------------------------------------------------------------------|-------------------------------------------------------------|
| ANJ ECD Y2H (25-405) fw                                                      | TACGTACCAGTGGATAATTACCTC                                    |
| ANJ ECD (25-405) rv                                                          | TTAACCAACATTCTTCTTAGTGGTTG                                  |
| FER ECD Y2H (28-446) fw                                                      | GCTGATTACTCTCCAACAGAGA                                      |
| FER ECD Y2H (28-446) rv                                                      | TTACGTATTGCTTTTCGATTTCTAG                                   |
| HERK1 kin Y2H (429-830) fw                                                   | GAAGAAGCGGAAACGTGGC                                         |
| HERK1 kin Y2H (429-830) rv                                                   | CCTCTTCCTTCAGATTTACCAGTTGTG                                 |
| ANJ kin Y2H (429-830) fw                                                     | GAAGAAACGAGGACGAGACC                                        |
| ANJ kin Y2H (429-830) rv                                                     | CCTCCACGTCCCTCAGATTTGATCAGCTGCG                             |
| FER kin Y2H (470-895) fw                                                     | GGCTTACCGCAGACGTAAGC                                        |
| FER kin Y2H (470-895) rv                                                     | CCACGTCCCTTTGGATTCATGA                                      |
| FER CRISPR construct 1 Out fw<br>(5' gRNA 1; target FER sequence underlined) | ATATATGGTCTCGATTG <u>TCTACCCAAACTCGTACG</u><br><u>AGTT</u>  |
| FER CRISPR construct 1 In fw<br>(5' gRNA 1)                                  | TGTTCTACCCAAACTCGTACGAGTTTTAGAGCTAGA<br>AATAGC              |
| FER CRISPR construct 1 In rv<br>(3' gRNA 1)                                  | AACCGAGTCCGTCACATTCCCTTCAATCTCTTAGTC<br>GACTCTAC            |
| FER CRISPR construct 1 Out rv<br>(3' gRNA 1)                                 | ATTATTGGTCTCGAAACCGAGTCCGTCACATTCCCT<br><u>TCAA</u>         |
| FER CRISPR construct 2 Out fw<br>(5' gRNA 2)                                 | ATATATGGTCTCGATTG <u>AAAAGGAGTATGCGGTGA</u><br><u>CAGTT</u> |
| FER CRISPR construct 2 In fw<br>(5' gRNA 2)                                  | TGAAAAGGAGTATGCGGTGACAGTTTTAGAGCTAG<br>AAATAGC              |



|                                                             |                                                             |
|-------------------------------------------------------------|-------------------------------------------------------------|
| FER CRISPR construct 2 In rv<br>(3' gRNA 2)                 | AAC <u>CGGAAGGCGAGATATCATTCCAATCTCTTAGTC</u><br>GACTCTAC    |
| FER CRISPR construct 2 Out rv<br>(3' gRNA 2)                | ATTATTGGTCTCGAAAC <u>CGGAAGGCGAGATATCATT</u><br><u>CCAA</u> |
| CRISPR-Cas9 <i>fer</i> mutant genotyping<br>inner primer fw | GATGAAGATCACAGAGGGACG                                       |
| CRISPR-Cas9 <i>fer</i> mutant genotyping<br>inner primer rv | CATTGACGCGATTCATGTTT                                        |
| CRISPR-Cas9 <i>fer</i> mutant genotyping<br>outer primer fw | TAACAGCTGCAACTGGTGC                                         |
| CRISPR-Cas9 <i>fer</i> mutant genotyping<br>outer primer rv | GCAGGACTTGGCACGAAATG                                        |
| Control gDNA region for genotyping<br>fw                    | CTGCCTTACGAGCATTGGTT                                        |
| Control gDNA region for genotyping<br>rv                    | TAACGCTTCCCAAGGTGATT                                        |
| HERK1 429-830 pOM fw                                        | AAGTTCTGTTTCAGGGCCCGAAGAAGCGGAAACGT<br>GGC                  |
| HERK1 429-830 pOM rv                                        | ATGGTCTAGAAAGCTTTATCTTCCTTCAGATTTAC                         |
| ANJ 429-829 pOM fw                                          | AAGTTCTGTTTCAGGGCCCGAAGAAACGAGGACGA<br>GAC                  |
| ANJ 429-829 pOM rv                                          | ATGGTCTAGAAAGCTTTAACGTCCCTCAGATTTG                          |

136

137

138 **Appendix Table S3. List of plasmids used in the present study and their corresponding**  
 139 **sources.**

| <b>Recombinant DNA</b>                                      | <b>Reference</b>          |
|-------------------------------------------------------------|---------------------------|
| <i>pHERK1::HERK1</i> in pGreen-IIS                          | This study                |
| <i>pANJ::ANJ-GFP</i> in pGreen-IIS                          | This study                |
| <i>pFER::FER-GFP</i> in pGreen-IIS                          | This study                |
| <i>pHERK1:HERK1-KD</i> in pGreen-IIS                        | This study                |
| <i>pHERK1:HERK1-KD-GFP</i> in pGreen-IIS                    | This study                |
| <i>pANJ::ANJ-KD-GFP</i> in pGreen-IIS                       | This study                |
| <i>pHERK1::GUS</i> in pGWB433                               | This study                |
| <i>pANJ::GUS</i> in pGWB433                                 | This study                |
| <i>pHERK1::H2B-tdTomato</i> in <i>pAH21</i>                 | This study                |
| <i>pANJ::H2B-tdTomato</i> in <i>pAH21</i>                   | This study                |
| <i>pFER::HERK1-GFP</i> in pMDC111                           | Prof. U. Grossniklaus [4] |
| <i>pMYB98::NTA-GFP</i> in pMDC83                            | Dr. S. Kessler [5]        |
| <i>p35S::HA-LRE</i> in pSK                                  | Dr. C. Li [6]             |
| <i>p35S::HA-LRE</i> in pMLBart                              | This study                |
| <i>pLRE::LRE-Citrine</i> in pMDC99                          | Prof. U. Grossniklaus [7] |
| <i>pU6-26::FER 5' gRNA 1</i> ; <i>pU6-29::FER 3' gRNA 1</i> | This study                |
| <i>pU6-26::FER 5' gRNA 2</i> ; <i>pU6-29::FER 3' gRNA 2</i> | This study                |
| <i>pGreen-IIS – Cterm GFP</i>                               | [8]                       |
| <i>pGWB433</i>                                              | [9]                       |

|                   |                      |
|-------------------|----------------------|
| <i>pGADT7</i>     | Clontech             |
| <i>pGBKT7</i>     | Clontech             |
| <i>pAH21\GW</i>   | Dr. M. Butenko       |
| <i>pBEE401E</i>   | Prof. D. Goring [10] |
| <i>pCBC-DT1T2</i> | Prof. D. Goring [10] |

140

141

## 142 **References**

143

- 144 1. Christensen CA, King EJ, Jordan JR, Drews GN (1997) Megagametogenesis in Arabidopsis wild  
145 type and the Gf mutant. *Sex Plant Reprod* **10**: 49-64
- 146 2. Duan Q, Kita D, Johnson EA, Aggarwal M, Gates L, Wu HM, Cheung AY (2014) Reactive oxygen  
147 species mediate pollen tube rupture to release sperm for fertilization in Arabidopsis. *Nat Commun*  
148 **5**: 3129
- 149 3. Tsukamoto T, Qin Y, Huang YD, Dunatunga D, Palanivelu R (2010) A role for LORELEI, a putative  
150 glycosylphosphatidylinositol-anchored protein, in Arabidopsis thaliana double fertilization and  
151 early seed development. *Plant Journal* **62**: 571-588
- 152 4. Kessler SA, Lindner H, Jones DS, Grossniklaus U (2015) Functional analysis of related CrRLK1L  
153 receptor-like kinases in pollen tube reception. *EMBO Rep* **16**: 107-115
- 154 5. Davis TC, Jones DS, Dino AJ, Cejda NI, Yuan J, Willoughby AC, Kessler SA (2017) Arabidopsis  
155 thaliana MLO genes are expressed in discrete domains during reproductive development. *Plant*  
156 *Reprod* **30**: 185-195
- 157 6. Li C, Yeh FL, Cheung AY, Duan Q, Kita D, Liu MC, Maman J, Luu EJ, Wu BW, Gates L, *et al.* (2015)  
158 Glycosylphosphatidylinositol-anchored proteins as chaperones and co-receptors for FERONIA  
159 receptor kinase signaling in Arabidopsis. *Elife* **4**:
- 160 7. Lindner H, Kessler SA, Muller LM, Shimosato-Asano H, Boisson-Dernier A, Grossniklaus U (2015)  
161 TURAN and EVAN mediate pollen tube reception in Arabidopsis Synergids through protein  
162 glycosylation. *PLoS Biol* **13**: e1002139
- 163 8. Mathieu J, Warthmann N, Kuttner F, Schmid M (2007) Export of FT protein from phloem  
164 companion cells is sufficient for floral induction in Arabidopsis. *Current Biology* **17**: 1055-1060
- 165 9. Nakagawa T, Suzuki T, Murata S, Nakamura S, Hino T, Maeo K, Tabata R, Kawai T, Tanaka K,  
166 Niwa Y, *et al.* (2007) Improved Gateway Binary Vectors: High-Performance Vectors for Creation of  
167 Fusion Constructs in Transgenic Analysis of Plants. *Bioscience, Biotechnology, and Biochemistry* **71**:  
168 2095-2100
- 169 10. Wang ZP, Xing HL, Dong L, Zhang HY, Han CY, Wang XC, Chen QJ (2015) Egg cell-specific  
170 promoter-controlled CRISPR/Cas9 efficiently generates homozygous mutants for multiple target  
171 genes in Arabidopsis in a single generation. *Genome Biol* **16**: 144

172

173
